# Supplementary material for: Intraspecific Comparative Analysis Reveals Genomic Variation of Didymella arachidicola and Pathogenicity Factors Potentially Related to Lesion Phenotype
Source: MDPI journal article supplement (doi:10.3390/biology12030476), 2023-03-21
Supplement: s1 [file s1]

## Supplementary Tables

# Intraspecific Comparative Analysis Reveals Genomic Variation of *Didymella arachidicola* and Pathogenicity Factors Potentially Related to Lesion Phenotype

Shaojian Li <sup>\*,†</sup>, Zhenyu Wang <sup>\*,†</sup>, Meng Gao, Tong Li, Xiaowei Cui, Junhuai Zu, Suling Sang, Wanwan Fan and Haiyan Zhang

Institute of Plant Protection, Henan Key Laboratory of Crop Pest Control, International Joint Research Laboratory for Crop Protection of Henan, Key Laboratory of Integrated Pest Management on Crops in Southern Region of North China, Henan Academy of Agricultural Sciences, Zhengzhou 450000, China

\* Correspondence: lishaojianli@126.com (S.L.); wangzy21@163.com (Z.W.)

**Supplementary Table S1.** The gene numbers predicted by different software

| Strategy             | Software     | Homology species               | Gene number |
|----------------------|--------------|--------------------------------|-------------|
| Ab initio prediction | Augustus     |                                | 12,728      |
|                      | Genscan      |                                | 12,139      |
|                      | GeneID       |                                | 16,627      |
|                      | GlimmerHMM   |                                | 15,287      |
|                      | SNAP         |                                | 16,061      |
| Homology based       | GeMoMa       | <i>Didymella exigua</i>        | 12,035      |
|                      |              | <i>Didymella heteroderae</i>   | 10,499      |
|                      |              | <i>Didymella keratinophila</i> | 10,549      |
| RNA-seq based        | PASA         |                                | 14,743      |
|                      | TransDecoder |                                | 21,683      |
| Integration          | EVM          |                                | 16,629      |

**Supplementary Table S2.** The statistics of gene annotation

**Supplementary Table S4.** All identified SNPs, InDels and filtered high-quality SNPs

**Supplementary Table S6.** The integrated gene set that shows the pathogenicity-related genes

**Supplementary Table S2, S4, and S6 are listed as excel files due to their large size.**

**Supplementary Table S3.** Summary of re-sequenced isolates, mapping and variants relative to the reference genome

| <b>Isolates</b> | <b>Origins</b>      | <b>Clean reads</b> | <b>Q30 (%)</b> | <b>GC (%)</b> | <b>content</b> | <b>Mapping rate (%)</b> | <b>SNPs</b> | <b>Ti/Tv</b> | <b>InDels -Insertion</b> | <b>InDels -Deletion</b> |
|-----------------|---------------------|--------------------|----------------|---------------|----------------|-------------------------|-------------|--------------|--------------------------|-------------------------|
| AY267           | Anyang, Henan       | 5,227,713          | 95.21          | 52.68         |                | 98.28                   | 3,417       | 3.13         | 141                      | 150                     |
| HeB274          | Baoding, Hebei      | 4,557,946          | 95.59          | 52.70         |                | 97.55                   | 2,959       | 3.07         | 131                      | 136                     |
| HeB275          | Handan, Hebei       | 4,454,868          | 95.10          | 52.08         |                | 98.50                   | 1,958       | 3.12         | 86                       | 119                     |
| HeB276          | Shijiazhuang, Hebei | 4,447,879          | 95.31          | 52.81         |                | 99.02                   | 3,251       | 3.09         | 163                      | 158                     |
| HuB260          | Wuhan, Hubei        | 3,010,100          | 93.92          | 52.58         |                | 99.41                   | 3,214       | 3.07         | 140                      | 148                     |
| JS280           | Xuzhou, Jiangsu     | 4,530,529          | 95.36          | 52.23         |                | 98.67                   | 2,679       | 3.47         | 129                      | 139                     |
| JY266           | Jiyuan, Henan       | 4,789,405          | 95.19          | 52.54         |                | 98.15                   | 2,358       | 3.27         | 95                       | 109                     |
| JZ112           | Jiaozuo, Henan      | 4,319,063          | 94.58          | 52.28         |                | 97.01                   | 3,293       | 3.23         | 147                      | 186                     |
| JZ272           | Jiaozuo, Henan      | 4,706,199          | 94.70          | 52.68         |                | 93.78                   | 2,472       | 3.09         | 120                      | 139                     |
| JZ273           | Jiaozuo, Henan      | 4,524,079          | 94.21          | 52.72         |                | 94.46                   | 2,921       | 3.13         | 138                      | 160                     |
| LN297           | Fuxin, Liaoning     | 3,936,144          | 94.17          | 51.44         |                | 97.73                   | 3,554       | 3.27         | 177                      | 172                     |
| LN299           | Shenyang, Liaoning  | 3,190,707          | 94.54          | 51.05         |                | 98.85                   | 3,461       | 3.14         | 163                      | 174                     |
| LN300           | Tieling, Liaoning   | 3,293,057          | 94.76          | 51.21         |                | 97.22                   | 3,906       | 3.28         | 188                      | 173                     |
| LN301           | Tieling, Liaoning   | 3,269,704          | 94.72          | 51.47         |                | 98.49                   | 3,493       | 3.21         | 169                      | 173                     |
| LY128           | Luoyang, Henan      | 2,767,415          | 93.65          | 52.70         |                | 99.66                   | 3,993       | 3.40         | 217                      | 190                     |
| LY268           | Luoyang, Henan      | 4,764,516          | 94.50          | 52.13         |                | 92.46                   | 2,901       | 3.13         | 153                      | 149                     |
| LY269           | Luoyang, Henan      | 4,583,975          | 94.31          | 52.81         |                | 95.17                   | 3,565       | 3.39         | 163                      | 179                     |
| NM298           | Tongliao, Neimeng   | 4,043,814          | 94.36          | 51.57         |                | 93.69                   | 5,374       | 3.25         | 267                      | 229                     |
| NY206           | Nanyang, Henan      | 2,820,889          | 94.11          | 52.74         |                | 99.30                   | 3,157       | 3.30         | 177                      | 168                     |

|       |                   |           |       |       |       |       |      |     |     |
|-------|-------------------|-----------|-------|-------|-------|-------|------|-----|-----|
| NY210 | Nanyang, Henan    | 4,512,676 | 94.37 | 52.24 | 97.41 | 3,210 | 2.99 | 130 | 153 |
| SC289 | Chengdu, Sichuan  | 3,552,798 | 94.02 | 51.86 | 98.36 | 3,580 | 3.33 | 187 | 174 |
| SC290 | Chengdu, Sichuan  | 3,373,635 | 93.65 | 51.31 | 98.69 | 1,986 | 2.97 | 89  | 101 |
| SC291 | Deyang, Sichuan   | 3,510,557 | 96.08 | 51.20 | 98.70 | 4,854 | 3.17 | 202 | 218 |
| SC292 | Deyang, Sichuan   | 3,368,239 | 95.29 | 51.41 | 98.56 | 3,700 | 3.28 | 190 | 163 |
| SC293 | Chengdu, Sichuan  | 3,415,390 | 95.24 | 50.95 | 97.99 | 3,614 | 3.20 | 178 | 185 |
| SC294 | Chengdu, Sichuan  | 3,333,554 | 93.83 | 51.32 | 98.29 | 3,140 | 3.20 | 177 | 153 |
| SC295 | Nanchong, Sichuan | 3,572,399 | 93.57 | 51.58 | 98.38 | 3,541 | 3.28 | 181 | 165 |
| SC296 | Nanchong, Sichuan | 3,909,250 | 94.10 | 51.59 | 98.58 | 3,465 | 3.30 | 166 | 172 |
| SD257 | Laixi, Shandong   | 2,339,160 | 91.78 | 53.03 | 99.16 | 3,707 | 2.91 | 207 | 173 |
| SD277 | Taian, Shandong   | 3,531,785 | 94.13 | 51.88 | 95.72 | 2,301 | 3.17 | 113 | 190 |
| SD278 | Taian, Shandong   | 4,227,415 | 94.58 | 51.96 | 90.13 | 3,103 | 3.37 | 146 | 170 |
| SD279 | Jinan, Shandong   | 4,037,187 | 94.35 | 52.13 | 93.75 | 2,045 | 3.17 | 100 | 131 |
| SQ264 | Shangqiu, Henan   | 4,440,903 | 94.42 | 52.24 | 98.15 | 2,457 | 3.23 | 97  | 161 |
| SQ265 | Shangqiu, Henan   | 4,435,473 | 95.23 | 52.08 | 98.87 | 2,597 | 3.23 | 122 | 142 |
| SX281 | Xinzhou, Shanxi   | 4,546,091 | 95.18 | 52.68 | 94.94 | 2,442 | 3.14 | 138 | 130 |
| SX282 | Lvliang, Shanxi   | 4,344,845 | 95.38 | 52.26 | 98.71 | 4,554 | 3.26 | 198 | 177 |
| SX283 | Lvliang, Shanxi   | 4,268,001 | 94.22 | 51.88 | 97.54 | 4,059 | 3.41 | 181 | 211 |
| YY240 | Xinxiang, Henan   | 5,359,735 | 95.66 | 52.48 | 98.50 | 2,024 | 3.05 | 99  | 115 |
| YY258 | Xinxiang, Henan   | 4,586,621 | 95.17 | 52.06 | 99.12 | 3,455 | 3.05 | 158 | 128 |
| ZK263 | Zhoukou, Henan    | 4,976,040 | 95.44 | 52.65 | 98.26 | 3,907 | 3.25 | 164 | 147 |

**Supplementary Table S5.** The statistics of differential genes

| <b>Isolates</b> | <b>Non-synonymous SNPs<br/>in exons</b> | <b>Genes with non-synonymous<br/>SNP <sup>1</sup></b> | <b>InDels in exons</b> | <b>Genes with<br/>CDS-InDel</b> | <b>Genes in differential gene set</b> |
|-----------------|-----------------------------------------|-------------------------------------------------------|------------------------|---------------------------------|---------------------------------------|
| AY267           | 381                                     | 314                                                   | 42                     | 30                              | 254                                   |
| HeB274          | 325                                     | 286                                                   | 27                     | 27                              | 227                                   |
| HeB275          | 224                                     | 167                                                   | 27                     | 22                              | 137                                   |
| HeB276          | 367                                     | 292                                                   | 49                     | 38                              | 247                                   |
| HuB260          | 366                                     | 305                                                   | 32                     | 29                              | 244                                   |
| JS280           | 298                                     | 241                                                   | 43                     | 37                              | 204                                   |
| JY266           | 228                                     | 185                                                   | 22                     | 19                              | 157                                   |
| JZ112           | 347                                     | 295                                                   | 52                     | 43                              | 248                                   |
| JZ272           | 290                                     | 229                                                   | 41                     | 30                              | 196                                   |
| JZ273           | 320                                     | 282                                                   | 29                     | 29                              | 223                                   |
| LN297           | 380                                     | 300                                                   | 53                     | 33                              | 251                                   |
| LN299           | 367                                     | 311                                                   | 42                     | 32                              | 256                                   |
| LN300           | 429                                     | 340                                                   | 59                     | 49                              | 291                                   |
| LN301           | 368                                     | 311                                                   | 47                     | 37                              | 256                                   |
| LY128           | 397                                     | 319                                                   | 46                     | 33                              | 255                                   |
| LY268           | 308                                     | 270                                                   | 34                     | 29                              | 216                                   |
| LY269           | 381                                     | 329                                                   | 40                     | 32                              | 264                                   |
| NM298           | 497                                     | 385                                                   | 56                     | 47                              | 315                                   |

|       |     |     |    |    |     |
|-------|-----|-----|----|----|-----|
| NY206 | 334 | 283 | 48 | 33 | 231 |
| NY210 | 356 | 309 | 35 | 32 | 249 |
| SC289 | 394 | 315 | 56 | 43 | 266 |
| SC290 | 239 | 178 | 30 | 23 | 146 |
| SC291 | 507 | 420 | 51 | 41 | 331 |
| SC292 | 381 | 291 | 49 | 33 | 238 |
| SC293 | 393 | 300 | 56 | 37 | 256 |
| SC294 | 360 | 311 | 37 | 33 | 258 |
| SC295 | 390 | 327 | 44 | 34 | 265 |
| SC296 | 371 | 315 | 48 | 33 | 257 |
| SD257 | 351 | 292 | 59 | 39 | 244 |
| SD277 | 255 | 215 | 55 | 51 | 199 |
| SD278 | 326 | 262 | 42 | 33 | 222 |
| SD279 | 242 | 176 | 33 | 28 | 148 |
| SQ264 | 258 | 202 | 48 | 36 | 174 |
| SQ265 | 292 | 234 | 43 | 34 | 200 |
| SX281 | 297 | 256 | 62 | 50 | 227 |
| SX282 | 474 | 402 | 54 | 40 | 326 |
| SX283 | 368 | 294 | 53 | 38 | 243 |
| YY240 | 239 | 181 | 31 | 25 | 151 |
| YY258 | 350 | 289 | 40 | 27 | 227 |
| ZK263 | 389 | 320 | 40 | 30 | 254 |

<sup>1</sup> Repeat statistics were not performed for multiple non-synonymous SNPs in the same gene

**Supplementary Table S7.** The repository and accession numbers of the datasets presented in this study

| Isolates | Organism                      | Repository | Accession Numbers |                 |
|----------|-------------------------------|------------|-------------------|-----------------|
|          |                               |            | Bioproject        | Assembly / SRA  |
| YY187    | <i>Didymella arachidicola</i> | NCBI       | PRJNA562378       | GCA_016630955.2 |
| AY267    | <i>Didymella arachidicola</i> | NCBI       | PRJNA562378       | SRR22426688     |
| HeB274   | <i>Didymella arachidicola</i> | NCBI       | PRJNA562378       | SRR22426687     |
| HeB275   | <i>Didymella arachidicola</i> | NCBI       | PRJNA562378       | SRR22426676     |
| HeB276   | <i>Didymella arachidicola</i> | NCBI       | PRJNA562378       | SRR22426665     |
| HuB260   | <i>Didymella arachidicola</i> | NCBI       | PRJNA562378       | SRR22426654     |
| JS280    | <i>Didymella arachidicola</i> | NCBI       | PRJNA562378       | SRR22426653     |
| JY266    | <i>Didymella arachidicola</i> | NCBI       | PRJNA562378       | SRR22426652     |
| JZ112    | <i>Didymella arachidicola</i> | NCBI       | PRJNA562378       | SRR22426651     |
| JZ272    | <i>Didymella arachidicola</i> | NCBI       | PRJNA562378       | SRR22426650     |
| JZ273    | <i>Didymella arachidicola</i> | NCBI       | PRJNA562378       | SRR22426649     |
| LN297    | <i>Didymella arachidicola</i> | NCBI       | PRJNA562378       | SRR22426686     |
| LN299    | <i>Didymella arachidicola</i> | NCBI       | PRJNA562378       | SRR22426685     |
| LN300    | <i>Didymella arachidicola</i> | NCBI       | PRJNA562378       | SRR22426684     |
| LN301    | <i>Didymella arachidicola</i> | NCBI       | PRJNA562378       | SRR22426683     |
| LY128    | <i>Didymella arachidicola</i> | NCBI       | PRJNA562378       | SRR22426682     |
| LY268    | <i>Didymella arachidicola</i> | NCBI       | PRJNA562378       | SRR22426681     |
| LY269    | <i>Didymella arachidicola</i> | NCBI       | PRJNA562378       | SRR22426680     |
| NM298    | <i>Didymella arachidicola</i> | NCBI       | PRJNA562378       | SRR22426679     |

---

|       |                               |      |             |             |
|-------|-------------------------------|------|-------------|-------------|
| NY206 | <i>Didymella arachidicola</i> | NCBI | PRJNA562378 | SRR22426678 |
| NY210 | <i>Didymella arachidicola</i> | NCBI | PRJNA562378 | SRR22426677 |
| SC289 | <i>Didymella arachidicola</i> | NCBI | PRJNA562378 | SRR22426675 |
| SC290 | <i>Didymella arachidicola</i> | NCBI | PRJNA562378 | SRR22426674 |
| SC291 | <i>Didymella arachidicola</i> | NCBI | PRJNA562378 | SRR22426673 |
| SC292 | <i>Didymella arachidicola</i> | NCBI | PRJNA562378 | SRR22426672 |
| SC293 | <i>Didymella arachidicola</i> | NCBI | PRJNA562378 | SRR22426671 |
| SC294 | <i>Didymella arachidicola</i> | NCBI | PRJNA562378 | SRR22426670 |
| SC295 | <i>Didymella arachidicola</i> | NCBI | PRJNA562378 | SRR22426669 |
| SC296 | <i>Didymella arachidicola</i> | NCBI | PRJNA562378 | SRR22426668 |
| SD257 | <i>Didymella arachidicola</i> | NCBI | PRJNA562378 | SRR22426667 |
| SD277 | <i>Didymella arachidicola</i> | NCBI | PRJNA562378 | SRR22426666 |
| SD278 | <i>Didymella arachidicola</i> | NCBI | PRJNA562378 | SRR22426664 |
| SD279 | <i>Didymella arachidicola</i> | NCBI | PRJNA562378 | SRR22426663 |
| SQ264 | <i>Didymella arachidicola</i> | NCBI | PRJNA562378 | SRR22426662 |
| SQ265 | <i>Didymella arachidicola</i> | NCBI | PRJNA562378 | SRR22426661 |
| SX281 | <i>Didymella arachidicola</i> | NCBI | PRJNA562378 | SRR22426660 |
| SX282 | <i>Didymella arachidicola</i> | NCBI | PRJNA562378 | SRR22426659 |
| SX283 | <i>Didymella arachidicola</i> | NCBI | PRJNA562378 | SRR22426658 |
| YY240 | <i>Didymella arachidicola</i> | NCBI | PRJNA562378 | SRR22426657 |
| YY258 | <i>Didymella arachidicola</i> | NCBI | PRJNA562378 | SRR22426656 |
| ZK263 | <i>Didymella arachidicola</i> | NCBI | PRJNA562378 | SRR22426655 |

---
